# Supplementary material
Source: ML conference proceedings conference paper supplement (https://openreview.net/forum?id=kcmw3OH5bh)

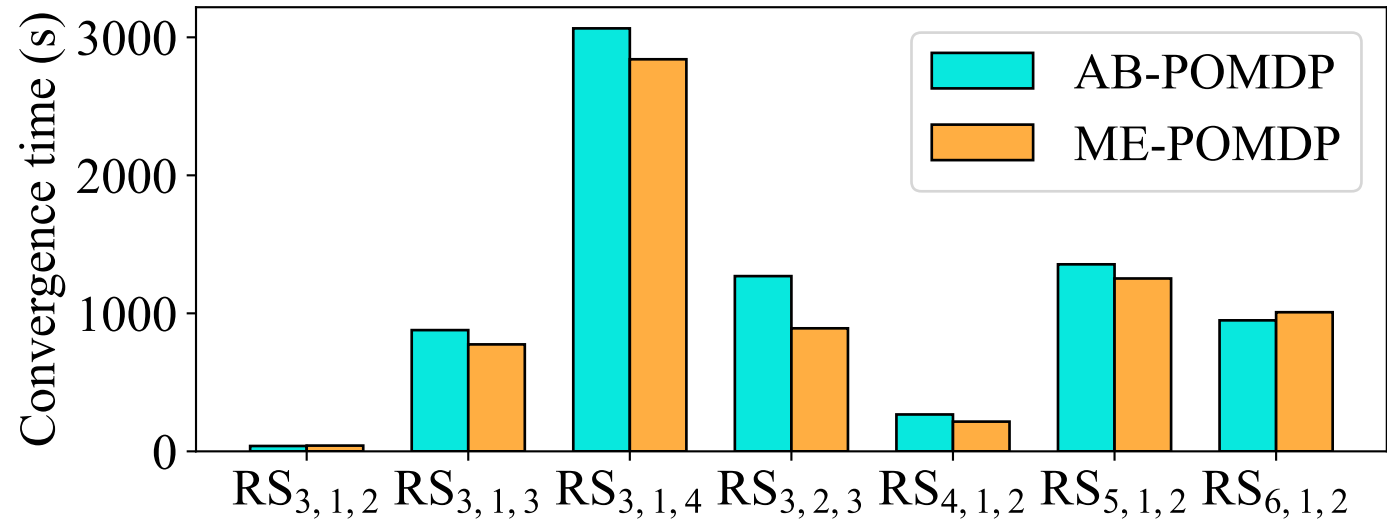

Supplement: supplementary_material [file AB-POMDP_vs_ME-POMDP.pdf › Figures/AB-POMDP_vs_ME-POMDP.pdf]

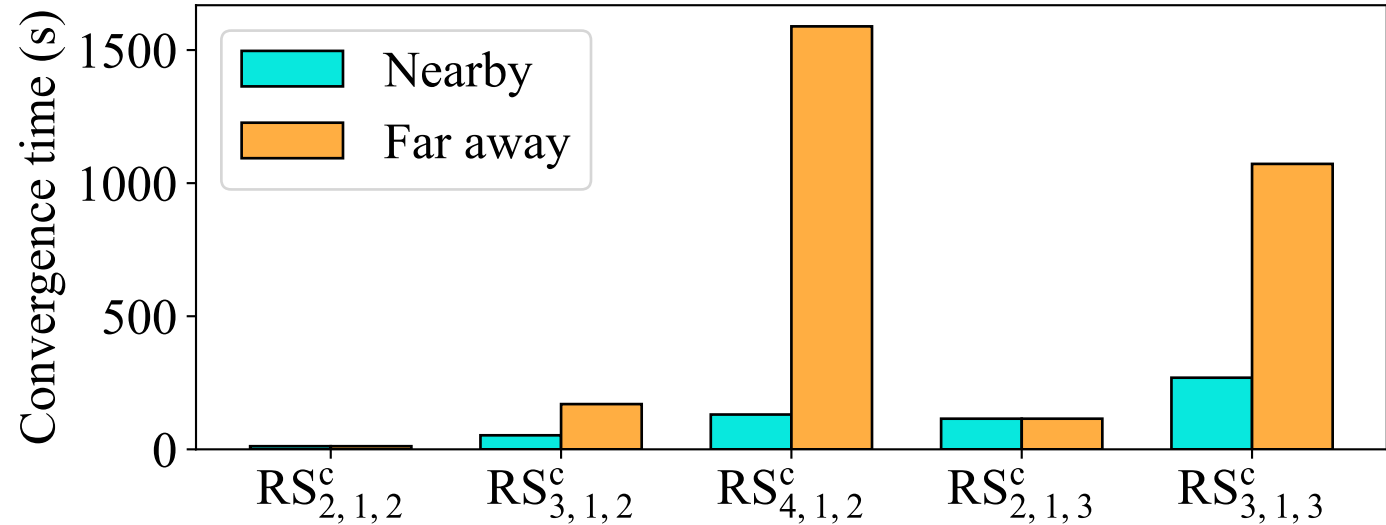

Supplement: supplementary_material [file Rocks_nearby_vs_far_away.pdf › Figures/Rocks_nearby_vs_far_away.pdf]

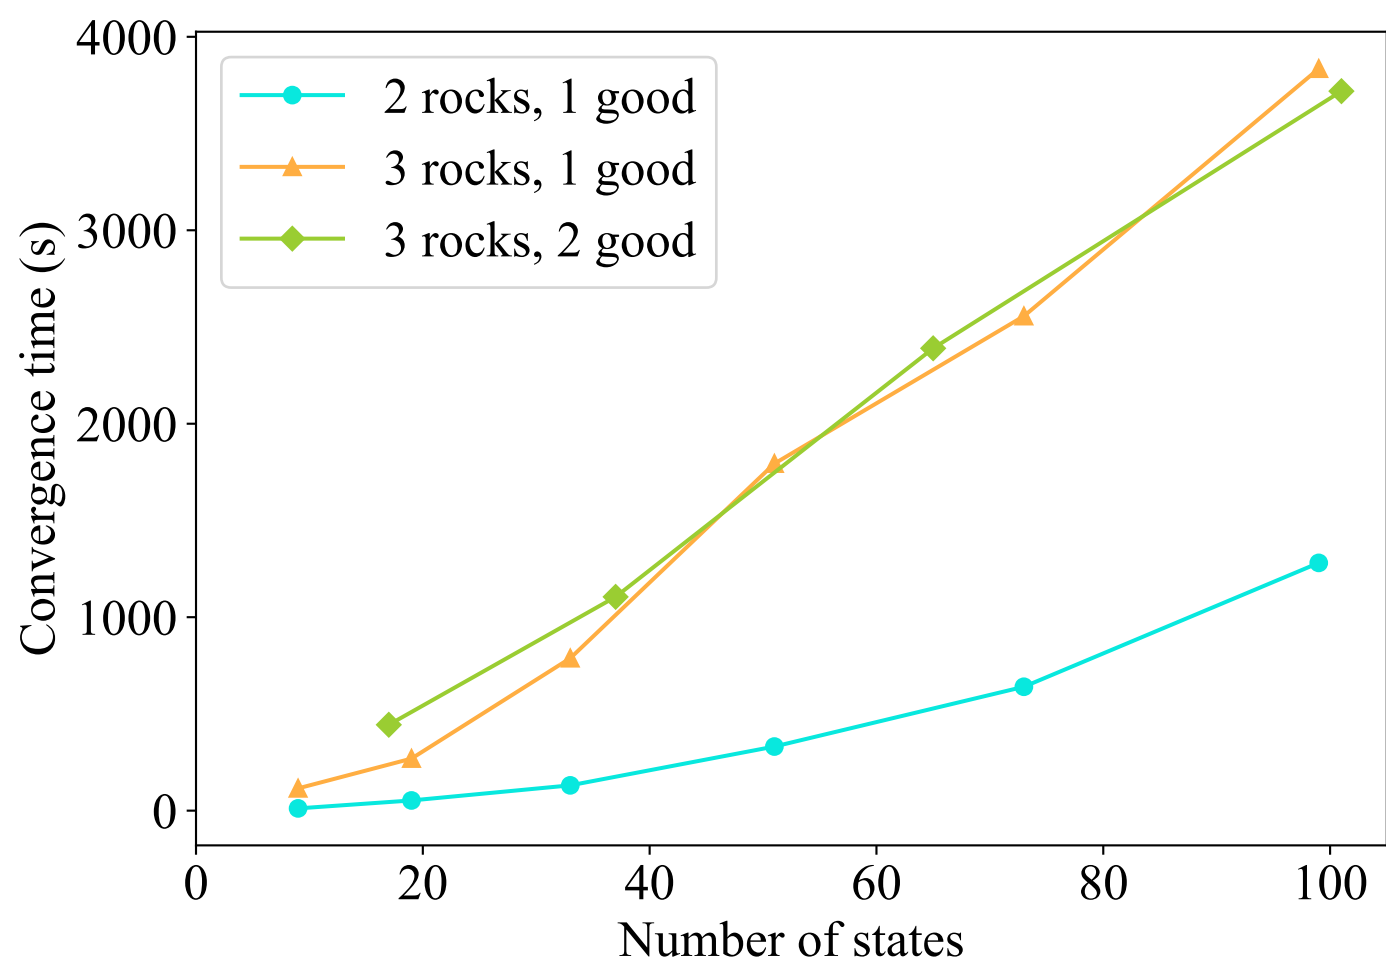

Supplement: supplementary_material [file Rocks_scaling_state_space.pdf › Figures/Rocks_scaling_state_space.pdf]

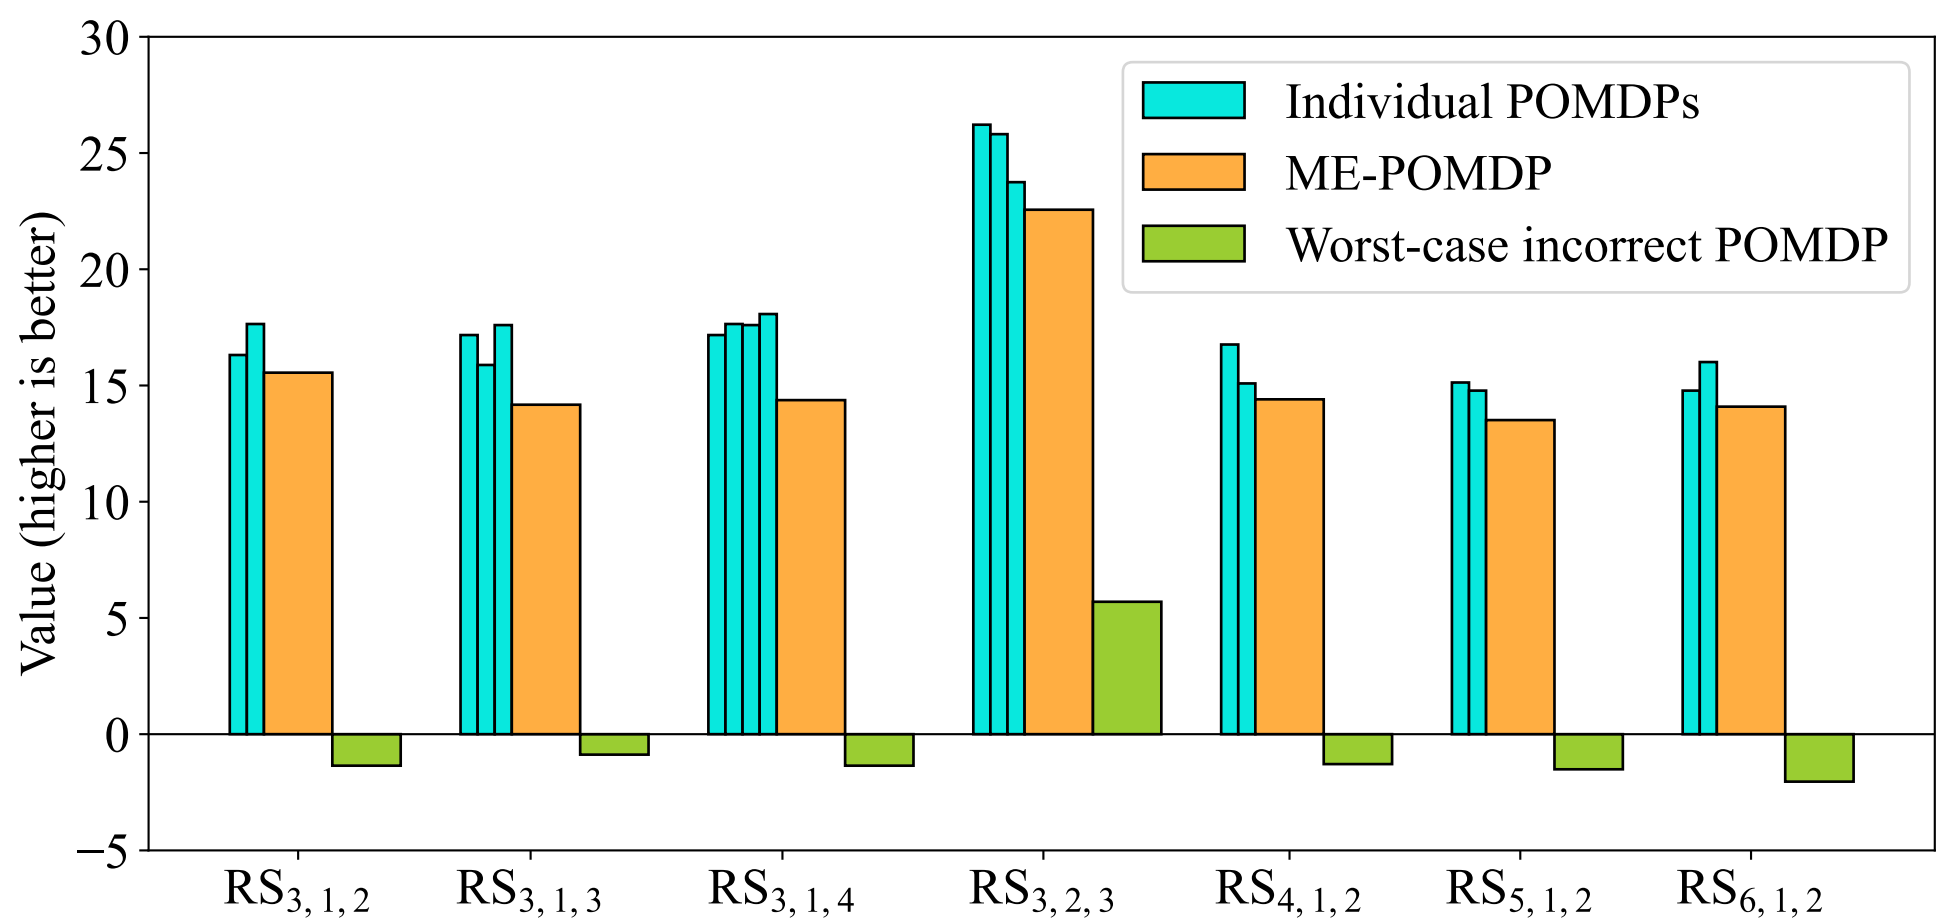

Supplement: supplementary_material [file robustness.pdf › Figures/robustness.pdf]
